# Supplementary material
Source: MDPI journal article supplement (https://www.mdpi.com/2075-5309/13/1/63)
Supplement: s1 [file s1]

Archive with 4 entries (4 files):
- RC_Inquiry_Suppl1_Survey_00.pdf
- RC_Inquiry_Suppl2_Interview_00.pdf
- RC_Inquiry_Suppl3_Surveyresponses_00.pdf
- RC_Inquiry_Suppl4_Demographics_00.pdf
