# Supplementary material
Source: MDPI journal article supplement (https://www.mdpi.com/2075-5309/13/1/63)
Supplement: s1 [file s1 › RC_Inquiry_Suppl2_Interview_00.pdf]

# Inquiry on perceptions and practices of built environment professionals regarding regenerative and circular approaches

Henrique Sala Benites, Paul Osmond and Deo Prasad

## Supplementary file 2 | INTERVIEW QUESTIONNAIRE

### INTERVIEW REGENERATIVE CIRCULARITY | GENERAL QUESTIONS | ENGLISH

Before we start, could you please briefly **introduce yourself, without your name, with professional and academic background?** No name please. Please also tell me **about the company you work for** and its product/service, and your role in it.

1) What is your understanding of these 3 concepts? (Adapted from/inspired by [1–3])

- (a) circular economy                      (b) regenerative design and development                      (c) planetary boundaries

#### Quick definitions:

- **Planetary boundaries** is a model that represents how human actions affect some of the main global systems, such as climate change, freshwater, ozone layer, land use, biosphere, among others. The idea is that if we stay within these boundaries, humanity can continue to develop and thrive without affecting the future.
- **Green** refers to when there is some improvement, but still causing some damage, some negative impact.
- **Sustainable** refers to when you achieve a net zero impact. There will always be some positive and negative impacts, but the overall balance is zero, or close to zero.
- And we move towards a **regenerative** approach once we start having overall positive impacts.

A **regenerative and circular built environment** based on 5 pillars: (1) positive impact, (2) systemic and life cycle thinking, (3) circular and just use of resources, (4) solutions inspired in nature and, (5) inclusive, equitable and safe urban spaces.

2) Do you think the **sustainability practices and tools**, such as LEED, BREEAM, AQUA-HQE, Green Star, that are used in the built environment sector, respond well to these concepts? (Adapted from/inspired by [4])

3) How do you think your **company or professional practices reflect these concepts?** Would you change something? (Adapted from/inspired by [5,6])

- a) Do you have any experience engaging with suppliers to improve or develop new sustainable products?

4) In your vision, what are the **main barriers and opportunities** to apply these concepts? (Adapted from/inspired by [5–11])

- a) And how do you see these concepts applied to **improve existing urban areas?**

5) What kind of **new business models** do you believe are needed to support a regenerative and circular built environment? (Adapted from/inspired by [12–14])

6) In what ways do you think there could be a better **integration of the built environment supply chain** to unlock a circular and regenerative approach? (Adapted from/inspired by [6,15])

7) What would you like to see in the **regulatory environment** to enable regenerative and circular practices? Any mandatory? (Adapted from/inspired by [16,17])

- a) How do you see financial incentives for sustainable practices in general?  
b) What do you think is needed to improve **social sustainability** in the development of communities and buildings? And how do you see the processes of **community engagement** in projects in your city or country? What should be improved? (Adapted from/inspired by [18–20])

8) Are you aware of, or have you ever used **gamified approaches** (game-like elements) to facilitate activities of teaching and learning, or participatory planning? Can you tell us more about it? What are your thoughts about it? (Adapted from/inspired by [21,22])

9) Is there any **project, pilot project, or experimentation** with circular or regenerative practices in the plans or under development?  
(a) **If yes**, could you talk more about it?                      (b) **If not**, is there any project or practice you would like to tell me about?

10) Do we need **better tools** to support a regenerative and circular approach? How different should they be?

11) In your opinion, what are the **top 3 actions** to move towards regenerative circularity in the built environment?

12) When thinking of sustainability, **what inspires you the most** outside of your professional practice?\*

## ENTREVISTA CIRCULARIDADE REGENERATIVA | QUESTÕES GERAIS | PORTUGUESE

Antes de começarmos, você poderia, por favor, se **apresentar**, sem nome, com sua formação profissional e acadêmica, e a empresa para a qual trabalha e sua função nela??

1) Qual é a sua definição dos seguintes conceitos?

(a) economia circular    (b) desenvolvimento e design regenerativo    (c) limites planetários

### Definições rápidas:

- **Limites planetários** é um modelo que representa como as ações humanas afetam alguns dos principais sistemas globais, como mudanças climáticas, água doce, camada de ozônio, uso do solo, biosfera, entre outros. A ideia é que, se permanecermos dentro desses limites, a humanidade poderá continuar a se desenvolver e prosperar sem afetar o futuro.
- **Verde** se refere a quando há alguma melhora, mas você ainda está causando algum dano, algum impacto negativo.
- **Sustentável** refere-se a quando você atinge um impacto líquido zero. Sempre haverá alguns impactos positivos e negativos, mas o saldo geral é zero ou próximo de zero.
- E avançamos para uma **abordagem regenerativa** assim que começarmos a ter impactos positivos gerais.

Um **ambiente construído regenerativo e circular** se baseia em **5 pilares**: (1) impacto positivo, (2) pensamento sistêmico e de ciclo de vida, (3) uso circular e justo dos recursos, (4) soluções inspiradas na natureza e, (5) espaços urbanos inclusivos, equitativos e seguros.

- 2) Você acha que as atuais **práticas e ferramentas de sustentabilidade**, como LEED, AQUA-HQE, Well e outras respondem adequadamente a estes conceitos?
- 3) Como você acha que **sua empresa ou práticas profissionais** refletem esses conceitos? Você mudaria alguma coisa?
- a) Você tem alguma experiência de engajamento com fornecedores para melhorar ou desenvolver novos produtos sustentáveis?
- 4) Na sua visão, quais são as principais **barreiras e oportunidades** para aplicar esses conceitos?
- a) E como você vê a aplicação destes conceitos para **melhorar áreas urbanas existentes**?
- 5) Que tipo de novos **modelos de negócios** você acredita que são necessários para apoiar um ambiente construído circular e regenerativo?
- 6) De que forma você acha que poderia haver uma melhor **integração da cadeia de suprimentos** da construção para facilitar uma abordagem circular e regenerativa?
- 7) Que mudanças você gostaria de ver no **ambiente regulatório** para facilitar a implementação de práticas regenerativas e circulares? Deveriam ser obrigatórias?
- a) Como você vê os incentivos financeiros para práticas sustentáveis em geral?
- 8) O que você acha que é necessário para melhorar a **sustentabilidade social** no desenvolvimento de comunidades e edifícios?
- a) E como você vê os **processos de engajamento de comunidades** em projetos em sua cidade/país? O que deve ser melhorado?
- 9) Você conhece ou já utilizou alguma **abordagem gamificada** (elementos de jogos ou lúdicos) para facilitar as atividades de ensino e aprendizagem, ou projeto e planejamento participativo? você pode nos falar mais sobre isso? Qual a sua percepção disso?
- 10) Existe algum **projeto, projeto piloto ou experimento** de práticas circulares ou regenerativas nos planos ou em desenvolvimento?
- (a) Se sim, você poderia falar mais sobre isso?    (b) Se não, há algum projeto ou prática que você gostaria de me contar?
- 11) Você acredita que precisamos de **melhores ferramentas** para alavancar uma abordagem regenerativa e circular? Se sim, o que deveria ser diferente nelas?
- 12) Na sua opinião, quais são as **3 principais ações** para avançar em direção à circularidade regenerativa no ambiente construído?
- 13) Ao pensar em sustentabilidade, **o que mais te inspira** fora da sua prática profissional?

## ENTREVISTA CIRCULARIDAD REGENERATIVA | CUESTIONES GENERALES | SPANISH

Antes de comenzar, ¿podría contarme brevemente sobre su formación profesional y académica, la empresa para la que trabaja y su función en ella?

1) ¿Cuál es su comprensión de estos conceptos?

(a) economía circular (b) diseño desarrollo o regenerativo (c) límites planetarios

Definiciones rápidas:

- **Límites planetarios** es un modelo que representa cómo las acciones humanas afectan algunos de los principales sistemas globales, como el cambio climático, el agua dulce, la capa de ozono, el uso del suelo, la biosfera, entre otros. La idea es que si nos mantenemos dentro de esos límites, la humanidad puede continuar desarrollándose y prosperando sin afectar el futuro.
- **Verde** se refiere a cuando hay una mejora, pero aún estás causando algún daño, algún impacto negativo.
- **Sostenible** se refiere a cuando logra un impacto neto cero. Siempre habrá algunos impactos positivos y negativos, pero el saldo general es cero o cercano a cero.
- Y avanzamos hacia un **enfoque regenerativo** tan pronto como comenzamos a tener impactos positivos generales.

Un **entorno construido regenerativo y circular** se basa en **5 pilares**: 1) impacto positivo, 2) pensamiento sistémico y de ciclo de vida, 3) uso circular y justo de los recursos, 4) soluciones inspiradas en la naturaleza y 5) espacios urbanos inclusivos, equitativos y seguros.

2) A la luz de estos conceptos, ¿cómo ve las **prácticas y herramientas de sostenibilidad**, como LEED, BREEAM, AQUA-HQE, Green Star, que se utilizan en el sector de la construcción y proyectos?

3) ¿Cómo cree que **su empresa o prácticas profesionales** reflejan estos conceptos? ¿Cambiaría algo?

a) ¿Tiene alguna experiencia en relacionarse con proveedores para mejorar o desarrollar nuevos productos sostenibles?

4) En su opinión, ¿cuáles son las principales **barreras y oportunidades** para aplicar estos conceptos?

a) ¿Y para mejorar las áreas urbanas existentes?

5) ¿Qué tipo de nuevos **modelos de negocios** cree que se necesitan para respaldar un entorno construido circular y regenerativo?

6) ¿Cómo cree que podría haber una mejor **integración de la cadena de suministro** de la construcción para facilitar un enfoque circular y regenerativo?

7) ¿Hay algún cambio que le gustaría ver en el **entorno regulatorio** (por ejemplo, legislación y políticas) que permitiría la implementación de prácticas circulares y regenerativas? ¿Deberían ser obligatorios?

a) ¿Cómo ve los incentivos financieros para las prácticas sostenibles en general?

8) ¿Qué crees que se necesita para mejorar los **aspectos sociales de la sostenibilidad** en el desarrollo de comunidades y edificios?

a) ¿Y cómo ve los procesos de participación comunitaria en proyectos en su ciudad o país? ¿Qué debería mejorarse?

9) ¿Conoce o ha utilizado algún **enfoque de ludificación** (juegos o elementos lúdicos) para facilitar las actividades de enseñanza y aprendizaje, o el diseño y la planificación participativa? ¿puedes contarnos más sobre esto? ¿Cuál es su percepción de esto?

10) ¿Existe algún **proyecto, proyecto piloto o experimento** con prácticas circulares o regenerativas en los planes o en desarrollo?

(a) De haber, ¿podría hablar más sobre ello?

(b) Si no, ¿hay algún proyecto o práctica que le gustaría contarme?

11) ¿Cree que **necesitamos mejores herramientas** para aprovechar un enfoque regenerativo y circular? Si es así, ¿qué debería ser diferente en ellos?

12) En su opinión, ¿cuáles son **las 3 acciones principales** para avanzar hacia la circularidad regenerativa en el entorno construido?

13) Una pregunta más filosófica, al pensar en sostenibilidad, ¿qué es lo que **más te inspira** fuera de tu práctica profesional?

## References

- [1] Q. Liu, H. Li, X. Zuo, F. Zhang, L. Wang, A survey and analysis on public awareness and performance for promoting circular economy in China: A case study from Tianjin, *Journal of Cleaner Production* 17 (2009) 265–270. <https://doi.org/10.1016/j.jclepro.2008.06.003>.
- [2] B. Guo, Y. Geng, T. Sterr, Q. Zhu, Y. Liu, Investigating public awareness on circular economy in western China: A case of Urumqi Midong, *Journal of Cleaner Production* 142 (2017) 2177–2186. <https://doi.org/10.1016/j.jclepro.2016.11.063>.
- [3] M. Smol, A. Avdiushchenko, J. Kulczycka, A. Nowaczek, Public awareness of circular economy in southern Poland: Case of the Malopolska region, *Journal of Cleaner Production* 197 (2018) 1035–1045. <https://doi.org/10.1016/j.jclepro.2018.06.100>.
- [4] P. Mang, B. Reed, Regenerative development and design, in: R.A. Meyers (Ed.), *Encyclopedia of sustainability science and technology*, Springer, New York, 2012, pp. 8855–8879.
- [5] B. Xue, X. Chen, Y. Geng, X. Guo, C. Lu, Z. Zhang, C. Lu, Survey of officials' awareness on circular economy development in China: Based on municipal and county level, *Resources, Conservation and Recycling* 54 (2010) 1296–1302. <https://doi.org/10.1016/j.resconrec.2010.05.010>.
- [6] G. Bressanelli, M. Perona, N. Saccani, Challenges in supply chain redesign for the Circular Economy: a literature review and a multiple case study, *International Journal of Production Research* 57 (2019) 7395–7422. <https://doi.org/10.1080/00207543.2018.1542176>.
- [7] B. Hopff, S. Nijhuis, L.A. Verhoef, New Dimensions for Circularity on Campus—Framework for the Application of Circular Principles in Campus Development, *Sustainability* 11 (2019) 627. <https://doi.org/10.3390/su11030627>.
- [8] K.T. Adams, M. Osmani, T. Thorpe, J. Thornback, Circular economy in construction: current awareness, challenges and enablers, *Proceedings of the Institution of Civil Engineers - Waste and Resource Management* 170 (2017) 15–24. <https://doi.org/10.1680/jwarm.16.00011>.
- [9] W. Debacker, S. Manshoven, D1 Synthesis report on State-of-the-art analysis: Key barriers and opportunities for Materials Passports and Reversible Building Design in the current system. BAMB Project - Building as Material Banks, 2016.
- [10] A. Mahpour, Prioritizing barriers to adopt circular economy in construction and demolition waste management, *Resources, Conservation and Recycling* 134 (2018) 216–227. <https://doi.org/10.1016/j.resconrec.2018.01.026>.
- [11] J. Kirchherr, D. Reike, M. Hekkert, Conceptualizing the circular economy: An analysis of 114 definitions, *Resources, Conservation and Recycling* 127 (2017) 221–232. <https://doi.org/10.1016/j.resconrec.2017.09.005>.
- [12] G. Carra, N. Magdani, *Circular Business Models for the Built Environment*, 2017.
- [13] D. Driesenaar, Business models: from linear to circular to regenerative, 2019. <https://medium.com/swlh/business-models-from-linear-to-circular-to-regenerative-9f10c19f337> (accessed 1 September 2020).
- [14] OECD, *Business Models for the Circular Economy: Opportunities and Challenges for Policy*, OECD, 2019.
- [15] Ellen MacArthur Foundation, ARUP, *Circular Economy in Cities: Project Guide. Urban Products System Summary*, 2019.
- [16] D. Eisenberg, S. Persram, Code, Regulatory and Systemic Barriers Affecting Living Building Projects. Cascadia Region Green Building Council, 2009.
- [17] C. Henrotay, M. Steinlage Cornet, W. Debacker, K. Peeters, L. Apelman, A. Quintas, J. Sharp, State of the art report on Policies and Standards. BAMB, 2016.
- [18] C. Garzillo, I. Balanciaga, A. Izulain, T. Rangil-Escribano, A. Wildman, Circular governance models for adaptive reuse of cultural heritage. CLIC project, Deliverable D3.4, 2019.
- [19] N. Dias, D. Amaratunga, K. Keraminiyage, R. Haigh, Balanced urban design process to create resilient and sustainable urban environments, in: P. Gardoni (Ed.), *Routledge Handbook of Sustainable and Resilient Infrastructure*, Routledge, Abingdon, Oxon, New York, NY Routledge, 2019. |, 2018, pp. 808–824.
- [20] M. Holden, C. Li, A. Molina, D. Sturgeon, Crafting New Urban Assemblages and Steering Neighborhood Transition: Actors and Roles in Eourban Neighborhood Development, *articulo* (2016). <https://doi.org/10.4000/articulo.3114>.
- [21] K.A. Whalen, C. Berlin, J. Ekberg, I. Barletta, P. Hammersberg, 'All they do is win': Lessons learned from use of a serious game for Circular Economy education, *Resources, Conservation and Recycling* 135 (2018) 335–345. <https://doi.org/10.1016/j.resconrec.2017.06.021>.
- [22] C. Ampatzidou, K. Gugerell, T. Constantinescu, O. Devisch, M. Jauschneg, M. Berger, All Work and No Play? Facilitating Serious Games and Gamified Applications in Participatory Urban Planning and Governance, *UP* 3 (2018) 34. <https://doi.org/10.17645/up.v3i1.1261>.
