# Supplementary material
Source: MDPI journal article supplement (https://www.mdpi.com/2075-5309/13/1/63)
Supplement: s1 [file s1 › RC_Inquiry_Suppl3_Surveyresponses_00.pdf]

# **Inquiry on perceptions and practices of built environment professionals regarding regenerative and circular approaches**

Henrique Sala Benites, Paul Osmond and Deo Prasad

## **Supplementary file 3 | Survey results**

### **Q2.1 - How well do you know each of these concepts?**

| #  | Question                          | I've heard of it but don't understand |              |           | Minimum | Maximum | Mean | Std       |          |  |
|----|-----------------------------------|---------------------------------------|--------------|-----------|---------|---------|------|-----------|----------|--|
|    |                                   | Never heard of it                     | it very well | Very well |         |         |      | Deviation | Variance |  |
| 1  | Urban Metabolism                  | 35.62%                                | 41.78%       | 22.60%    | 1       | 3       | 2.8  | 0.42      | 0.17     |  |
| 2  | Circular Economy or Circularity   | 6.85%                                 | 34.25%       | 58.90%    | 1       | 3       | 1.6  | 0.67      | 0.45     |  |
| 3  | Urban mining                      | 50.68%                                | 39.04%       | 10.27%    | 1       | 3       | 1.87 | 0.75      | 0.57     |  |
| 4  | Building as material banks        | 41.78%                                | 39.04%       | 19.18%    | 1       | 3       | 2.45 | 0.63      | 0.4      |  |
| 5  | Regenerative Development          | 7.53%                                 | 39.73%       | 52.74%    | 1       | 3       | 2.38 | 0.67      | 0.46     |  |
| 6  | Citizen science                   | 40.41%                                | 39.73%       | 19.86%    | 1       | 3       | 1.79 | 0.75      | 0.56     |  |
| 7  | Urban quality of life/liveability | 0.68%                                 | 18.49%       | 80.82%    | 1       | 3       | 2.52 | 0.62      | 0.39     |  |
| 8  | Ecosystem Services                | 10.96%                                | 39.73%       | 49.32%    | 1       | 3       | 1.77 | 0.75      | 0.56     |  |
| 9  | Biomimicry/Biomimetics            | 17.12%                                | 33.56%       | 49.32%    | 1       | 3       | 2.28 | 0.78      | 0.61     |  |
| 10 | Biophilic Design                  | 20.55%                                | 30.82%       | 48.63%    | 1       | 3       | 2.32 | 0.75      | 0.56     |  |

### **Q3.2 - How important are these items to make a regenerative and circular neighbourhood?**

| #  | Question                                                              | Not at all important | Slightly important | Moderately important | Very important | Extremely important | Minimum | Maximum | Mean | Std       |          |  |
|----|-----------------------------------------------------------------------|----------------------|--------------------|----------------------|----------------|---------------------|---------|---------|------|-----------|----------|--|
|    |                                                                       |                      |                    |                      |                |                     |         |         |      | Deviation | Variance |  |
| 1  | Accessibility for disabled people                                     | 0.00%                | 0.69%              | 4.83%                | 30.34%         | 64.14%              | 2       | 5       | 4.58 | 0.62      | 0.38     |  |
| 2  | Designated pedestrian crossings                                       | 0.00%                | 1.38%              | 8.28%                | 37.24%         | 53.10%              | 2       | 5       | 4.42 | 0.7       | 0.49     |  |
| 3  | Wayfinding/Signs for pedestrians                                      | 0.00%                | 2.07%              | 13.79%               | 37.93%         | 46.21%              | 2       | 5       | 4.28 | 0.78      | 0.6      |  |
| 4  | Honouring traditional/indigenous cultures/practices                   | 0.69%                | 4.83%              | 20.69%               | 31.72%         | 42.07%              | 1       | 5       | 4.1  | 0.93      | 0.87     |  |
| 5  | Street trees                                                          | 0.00%                | 0.00%              | 4.83%                | 23.45%         | 71.72%              | 3       | 5       | 4.67 | 0.56      | 0.32     |  |
| 6  | Accessible/nearby lakes and rivers                                    | 0.00%                | 6.90%              | 24.14%               | 33.10%         | 35.86%              | 2       | 5       | 3.98 | 0.94      | 0.88     |  |
| 7  | Other nearby green spaces, as parks                                   | 0.00%                | 0.00%              | 5.52%                | 28.28%         | 66.21%              | 3       | 5       | 4.61 | 0.59      | 0.35     |  |
| 8  | Presence of fauna/animals in public spaces                            | 2.07%                | 10.34%             | 26.21%               | 38.62%         | 22.76%              | 1       | 5       | 3.7  | 1         | 1        |  |
| 9  | Landscape integrated drainage                                         | 0.00%                | 2.07%              | 8.97%                | 32.41%         | 56.55%              | 2       | 5       | 4.43 | 0.74      | 0.55     |  |
| 10 | Vegetated roofs and walls                                             | 1.38%                | 7.59%              | 33.10%               | 33.79%         | 24.14%              | 1       | 5       | 3.72 | 0.96      | 0.92     |  |
| 11 | Areas for exercise and play                                           | 0.00%                | 1.38%              | 8.28%                | 40.69%         | 49.66%              | 2       | 5       | 4.39 | 0.7       | 0.49     |  |
| 12 | Diversity of shops and basic services on walking distance             | 0.69%                | 1.38%              | 7.59%                | 40.00%         | 50.34%              | 1       | 5       | 4.38 | 0.74      | 0.55     |  |
| 13 | Mix of low, medium and high-rise buildings                            | 4.83%                | 13.10%             | 26.90%               | 30.34%         | 24.83%              | 1       | 5       | 3.57 | 1.14      | 1.29     |  |
| 14 | Outdoor areas protected from weather (e.g. canopies)                  | 0.00%                | 6.90%              | 19.31%               | 45.52%         | 28.28%              | 2       | 5       | 3.95 | 0.87      | 0.75     |  |
| 15 | Public seating areas                                                  | 0.00%                | 0.00%              | 11.72%               | 49.66%         | 38.62%              | 3       | 5       | 4.27 | 0.66      | 0.43     |  |
| 16 | Visually permeable urban spaces                                       | 0.69%                | 2.07%              | 13.79%               | 48.97%         | 34.48%              | 1       | 5       | 4.14 | 0.78      | 0.61     |  |
| 17 | Public lighting at night                                              | 0.00%                | 1.38%              | 11.72%               | 33.79%         | 53.10%              | 2       | 5       | 4.39 | 0.74      | 0.55     |  |
| 18 | Residential ground level privacy                                      | 4.14%                | 7.59%              | 33.79%               | 29.66%         | 24.83%              | 1       | 5       | 3.63 | 1.06      | 1.13     |  |
| 19 | Community participation in governance                                 | 0.69%                | 2.07%              | 11.72%               | 33.79%         | 51.72%              | 1       | 5       | 4.34 | 0.82      | 0.67     |  |
| 20 | Diverse socio-economic background of residents                        | 1.38%                | 3.45%              | 18.62%               | 48.97%         | 27.59%              | 1       | 5       | 3.98 | 0.85      | 0.72     |  |
| 21 | Car and bike sharing program                                          | 0.00%                | 8.28%              | 20.69%               | 37.93%         | 33.10%              | 2       | 5       | 3.96 | 0.93      | 0.87     |  |
| 22 | Free internet in public areas                                         | 2.07%                | 13.10%             | 31.72%               | 33.79%         | 19.31%              | 1       | 5       | 3.55 | 1.01      | 1.02     |  |
| 23 | Panels and sensors showing air quality, temperature, and noise levels | 5.52%                | 15.86%             | 33.10%               | 26.90%         | 18.62%              | 1       | 5       | 3.37 | 1.12      | 1.25     |  |
| 24 | Cycle paths                                                           | 0.00%                | 0.69%              | 7.59%                | 35.86%         | 55.86%              | 2       | 5       | 4.47 | 0.66      | 0.44     |  |
| 25 | Public transportation availability                                    | 0.69%                | 0.00%              | 1.38%                | 20.69%         | 77.24%              | 1       | 5       | 4.74 | 0.55      | 0.3      |  |
| 26 | Reduced public parking spots                                          | 5.52%                | 8.28%              | 31.72%               | 31.72%         | 22.76%              | 1       | 5       | 3.58 | 1.09      | 1.2      |  |

# **Inquiry on perceptions and practices of built environment professionals regarding regenerative and circular approaches**

Henrique Sala Benites, Paul Osmond and Deo Prasad

## **Supplementary file 3 | Survey results**

|           |                                                      |       |        |        |        |        |   |   |      |      |      |
|-----------|------------------------------------------------------|-------|--------|--------|--------|--------|---|---|------|------|------|
| <b>27</b> | Shelter and seating in transit stops                 | 0.00% | 0.69%  | 12.41% | 38.62% | 48.28% | 2 | 5 | 4.34 | 0.72 | 0.52 |
| <b>28</b> | Transit stops with real-time information             | 0.00% | 4.83%  | 15.86% | 42.07% | 37.24% | 2 | 5 | 4.12 | 0.84 | 0.71 |
| <b>29</b> | Building and open spaces prepared for climate change | 0.69% | 2.76%  | 8.28%  | 31.72% | 56.55% | 1 | 5 | 4.41 | 0.81 | 0.66 |
| <b>30</b> | Communal composting and food garden                  | 0.69% | 4.14%  | 25.52% | 38.62% | 31.03% | 1 | 5 | 3.95 | 0.89 | 0.79 |
| <b>31</b> | Visual attractiveness                                | 0.00% | 3.45%  | 21.38% | 42.07% | 33.10% | 2 | 5 | 4.05 | 0.82 | 0.68 |
| <b>32</b> | Certification of buildings and communities           | 4.14% | 17.93% | 26.21% | 31.72% | 20.00% | 1 | 5 | 3.46 | 1.12 | 1.25 |
| <b>33</b> | Smart city solutions                                 | 4.14% | 7.59%  | 17.24% | 32.41% | 38.62% | 1 | 5 | 3.94 | 1.11 | 1.23 |

## **Q3.3 - How important are these strategies for a circular and regenerative use and management of RESOURCES (materials, energy, water)?**

| #         | Question                                                                           | Not at all important | Slightly important | Moderately important | Very important | Extremely important | Minimum | Maximum | Mean  | Std Deviation | Variance |
|-----------|------------------------------------------------------------------------------------|----------------------|--------------------|----------------------|----------------|---------------------|---------|---------|-------|---------------|----------|
| <b>1</b>  | Reconvert degraded sites                                                           | 0.00%                | 2.07%              | 7.59%                | 38.62%         | 51.72%              | 17      | 20      | 19.4  | 0.72          | 0.52     |
| <b>2</b>  | Adapting/Retrofitting old buildings                                                | 0.00%                | 0.69%              | 8.28%                | 33.10%         | 57.93%              | 17      | 20      | 19.48 | 0.68          | 0.46     |
| <b>3</b>  | Increase urban density                                                             | 2.76%                | 8.97%              | 33.10%               | 33.79%         | 21.38%              | 16      | 20      | 18.62 | 1             | 1.01     |
| <b>4</b>  | Multifunctional landscape for water management                                     | 0.69%                | 0.69%              | 12.41%               | 43.45%         | 42.76%              | 16      | 20      | 19.27 | 0.75          | 0.57     |
| <b>5</b>  | Permeable pavements                                                                | 0.00%                | 2.76%              | 11.03%               | 44.14%         | 42.07%              | 17      | 20      | 19.26 | 0.76          | 0.58     |
| <b>6</b>  | Design for deconstruction/disassembly                                              | 0.69%                | 3.45%              | 17.24%               | 36.55%         | 42.07%              | 16      | 20      | 19.16 | 0.88          | 0.77     |
| <b>7</b>  | Design for flexible use and adaptation                                             | 0.00%                | 2.07%              | 11.03%               | 35.17%         | 51.72%              | 17      | 20      | 19.37 | 0.76          | 0.58     |
| <b>8</b>  | Technical solutions inspired by nature                                             | 0.69%                | 4.83%              | 16.55%               | 39.31%         | 38.62%              | 16      | 20      | 19.1  | 0.89          | 0.8      |
| <b>9</b>  | Digital marketplaces for salvaged materials                                        | 1.38%                | 6.21%              | 22.76%               | 40.00%         | 29.66%              | 16      | 20      | 18.9  | 0.94          | 0.89     |
| <b>10</b> | Sharing platforms for tools and things                                             | 0.69%                | 4.83%              | 28.28%               | 35.17%         | 31.03%              | 16      | 20      | 18.91 | 0.92          | 0.84     |
| <b>11</b> | Building Management Systems (BMS)                                                  | 0.69%                | 5.52%              | 20.00%               | 43.45%         | 30.34%              | 16      | 20      | 18.97 | 0.89          | 0.79     |
| <b>12</b> | 3D printing of components and buildings                                            | 8.97%                | 18.62%             | 36.55%               | 26.90%         | 8.97%               | 16      | 20      | 18.08 | 1.08          | 1.17     |
| <b>13</b> | Bio-based materials (timber, bamboo...)                                            | 0.00%                | 8.28%              | 14.48%               | 42.07%         | 35.17%              | 17      | 20      | 19.04 | 0.91          | 0.83     |
|           | Alternative bio-based materials (e.g. plastic made of fungi, vegetable "leathers") | 2.07%                | 6.21%              | 18.62%               | 33.10%         | 40.00%              | 16      | 20      | 19.03 | 1.01          | 1.02     |
| <b>15</b> | Use of non-toxic resources                                                         | 0.69%                | 0.00%              | 6.90%                | 22.07%         | 70.34%              | 16      | 20      | 19.61 | 0.68          | 0.46     |
| <b>16</b> | Products with recycled content                                                     | 0.69%                | 2.76%              | 17.24%               | 36.55%         | 42.76%              | 16      | 20      | 19.18 | 0.86          | 0.74     |
| <b>17</b> | Replace overused/scarce materials with alternatives                                | 2.76%                | 0.69%              | 8.28%                | 29.66%         | 58.62%              | 16      | 20      | 19.41 | 0.88          | 0.78     |
| <b>18</b> | Building inventory of materials available                                          | 1.38%                | 5.52%              | 17.93%               | 46.21%         | 28.97%              | 16      | 20      | 18.96 | 0.9           | 0.81     |
| <b>19</b> | Materials passport with environmental information                                  | 1.38%                | 5.52%              | 15.86%               | 34.48%         | 42.76%              | 16      | 20      | 19.12 | 0.96          | 0.92     |
| <b>20</b> | Materials tracing and tracking                                                     | 0.69%                | 5.52%              | 15.86%               | 35.86%         | 42.07%              | 16      | 20      | 19.13 | 0.92          | 0.84     |
| <b>21</b> | Open-source design                                                                 | 1.38%                | 8.97%              | 26.90%               | 37.93%         | 24.83%              | 16      | 20      | 18.76 | 0.97          | 0.94     |
| <b>22</b> | Product upgrade                                                                    | 2.07%                | 10.34%             | 29.66%               | 35.86%         | 22.07%              | 16      | 20      | 18.66 | 1             | 1        |
| <b>23</b> | Community gardens for food production                                              | 0.69%                | 6.21%              | 26.90%               | 38.62%         | 27.59%              | 16      | 20      | 18.86 | 0.91          | 0.84     |
| <b>24</b> | District energy/water systems                                                      | 0.69%                | 4.14%              | 13.10%               | 38.62%         | 43.45%              | 16      | 20      | 19.2  | 0.87          | 0.75     |
| <b>25</b> | Energy from waste incineration                                                     | 4.83%                | 13.79%             | 26.21%               | 28.97%         | 26.21%              | 16      | 20      | 18.58 | 1.15          | 1.33     |
| <b>26</b> | Local renewable energy production                                                  | 0.00%                | 0.69%              | 6.90%                | 31.03%         | 61.38%              | 17      | 20      | 19.53 | 0.65          | 0.43     |
| <b>27</b> | Local treatment of wastewater with plants                                          | 0.69%                | 2.76%              | 14.48%               | 32.41%         | 49.66%              | 16      | 20      | 19.28 | 0.86          | 0.74     |
| <b>28</b> | Waste bins in public areas                                                         | 0.00%                | 4.83%              | 16.55%               | 23.45%         | 55.17%              | 17      | 20      | 19.29 | 0.91          | 0.83     |
| <b>29</b> | Waste as resource/input                                                            | 0.00%                | 1.38%              | 8.28%                | 35.17%         | 55.17%              | 17      | 20      | 19.44 | 0.7           | 0.49     |
| <b>30</b> | Water self-sufficiency                                                             | 0.69%                | 0.69%              | 5.52%                | 32.41%         | 60.69%              | 16      | 20      | 19.52 | 0.7           | 0.48     |
| <b>31</b> | Public areas for composting                                                        | 1.38%                | 8.97%              | 26.21%               | 35.86%         | 27.59%              | 16      | 20      | 18.79 | 0.99          | 0.98     |
| <b>32</b> | Shared infrastructure in communities/industrial parks                              | 0.00%                | 0.69%              | 22.76%               | 42.76%         | 33.79%              | 17      | 20      | 19.1  | 0.76          | 0.58     |
| <b>33</b> | Passive building design                                                            | 0.69%                | 2.76%              | 14.48%               | 33.79%         | 48.28%              | 16      | 20      | 19.26 | 0.86          | 0.73     |
| <b>34</b> | Positive energy (more energy than used by the project)                             | 1.38%                | 3.45%              | 15.86%               | 37.24%         | 42.07%              | 16      | 20      | 19.15 | 0.9           | 0.82     |
| <b>35</b> | Industry/Supply chain collaboration                                                | 1.38%                | 1.38%              | 14.48%               | 37.93%         | 44.83%              | 16      | 20      | 19.23 | 0.85          | 0.72     |
| <b>36</b> | Life cycle analysis (environmental, social, and cost)                              | 0.69%                | 2.07%              | 8.28%                | 27.59%         | 61.38%              | 16      | 20      | 19.47 | 0.79          | 0.62     |

# **Inquiry on perceptions and practices of built environment professionals regarding regenerative and circular approaches**

Henrique Sala Benites, Paul Osmond and Deo Prasad

## **Supplementary file 3 | Survey results**

Local businesses with regenerative and circular

|                                                                  |       |        |        |        |        |    |    |       |      |      |
|------------------------------------------------------------------|-------|--------|--------|--------|--------|----|----|-------|------|------|
| <b>37</b> products/services                                      | 0.69% | 2.07%  | 11.72% | 33.79% | 51.72% | 16 | 20 | 19.34 | 0.82 | 0.67 |
| <b>38</b> Transparent business practices                         | 1.38% | 3.45%  | 13.79% | 31.03% | 50.34% | 16 | 20 | 19.26 | 0.92 | 0.84 |
| <b>39</b> Self-repair design                                     | 1.38% | 8.97%  | 16.55% | 41.38% | 31.72% | 16 | 20 | 18.93 | 0.98 | 0.96 |
| <b>40</b> Product-as-service/Pay-per-use for building components | 2.07% | 11.03% | 30.34% | 28.97% | 27.59% | 16 | 20 | 18.69 | 1.05 | 1.11 |
| <b>41</b> Take-back/Reverse logistics programmes                 | 0.69% | 6.21%  | 17.24% | 24.83% | 51.03% | 16 | 20 | 19.19 | 0.98 | 0.96 |

## **Q3.4 - How do you think these aspects of life in the city will change in the following months and years compared to previous years?**

| #        | Question                              | For the better | Will remain the same | For the worse | Minimum | Maximum | Mean | Std Deviation | Variance | Variance |
|----------|---------------------------------------|----------------|----------------------|---------------|---------|---------|------|---------------|----------|----------|
| <b>1</b> | The NEED for more public open spaces? | 65.52%         | 22.76%               | 11.72%        | 1       | 3       | 1.46 | 0.7           | 0.48     | 0.48     |
| <b>2</b> | The USE of public open spaces?        | 73.79%         | 17.93%               | 8.28%         | 1       | 3       | 1.34 | 0.63          | 0.39     | 0.39     |
| <b>3</b> | The design of buildings and houses?   | 69.66%         | 21.38%               | 8.97%         | 1       | 3       | 1.39 | 0.65          | 0.42     | 0.42     |
| <b>4</b> | The possibility of working from home  | 87.59%         | 8.28%                | 4.14%         | 1       | 3       | 1.17 | 0.47          | 0.22     | 0.22     |

## **Q3.5 - If you would like to say how or why, please use this space:**

*Hidden to avoid any potential breach of privacy*

## **Q4.1 - To what extent do you perceive these items as barriers for the adoption of regenerative and circular practices in the built environment?Please rate them from 1 to 5 (1 = not a barrier, 5 = very strong barrier)**

| #         | Question                                                                                    | 1 (not a barrier) | 2      | 3      | 4 (very strong barrier) | 5 (very strong barrier) | Minimum | Maximum | Mean | Std Deviation | Variance |
|-----------|---------------------------------------------------------------------------------------------|-------------------|--------|--------|-------------------------|-------------------------|---------|---------|------|---------------|----------|
| <b>1</b>  | Limited awareness of regenerative and circular practices                                    | 0.71%             | 4.26%  | 14.18% | 33.33%                  | 47.52%                  | 1       | 5       | 4.23 | 0.89          | 0.8      |
| <b>2</b>  | Lack of financial incentives                                                                | 1.42%             | 2.13%  | 10.64% | 27.66%                  | 58.16%                  | 1       | 5       | 4.39 | 0.87          | 0.75     |
| <b>3</b>  | Cost of externalities not included in products                                              | 0.00%             | 2.84%  | 25.53% | 37.59%                  | 34.04%                  | 2       | 5       | 4.03 | 0.84          | 0.71     |
| <b>4</b>  | Uncertainties about long-term return of investment                                          | 3.55%             | 8.51%  | 18.44% | 37.59%                  | 31.91%                  | 1       | 5       | 3.86 | 1.07          | 1.14     |
| <b>5</b>  | Lack of enforcing policies and regulations                                                  | 0.00%             | 6.38%  | 9.22%  | 30.50%                  | 53.90%                  | 2       | 5       | 4.32 | 0.89          | 0.78     |
| <b>6</b>  | Limitation of existing tools (LEED, BREEAM, AQUA, Green Star, etc.)                         | 12.77%            | 13.48% | 35.46% | 23.40%                  | 14.89%                  | 1       | 5       | 3.14 | 1.21          | 1.46     |
| <b>7</b>  | Tendering based on lowest price                                                             | 0.71%             | 5.67%  | 12.77% | 29.79%                  | 51.06%                  | 1       | 5       | 4.25 | 0.93          | 0.87     |
| <b>8</b>  | Inertia of the construction sector with new approaches                                      | 0.71%             | 4.29%  | 20.71% | 38.57%                  | 35.71%                  | 1       | 5       | 4.04 | 0.89          | 0.8      |
| <b>9</b>  | Lack of market mechanisms for resource recovery in the end of use                           | 0.72%             | 5.76%  | 16.55% | 39.57%                  | 37.41%                  | 1       | 5       | 4.07 | 0.91          | 0.83     |
| <b>10</b> | Lack of marketplaces for secondary materials/ resources                                     | 1.42%             | 12.77% | 24.82% | 33.33%                  | 27.66%                  | 1       | 5       | 3.73 | 1.04          | 1.09     |
| <b>11</b> | Fragmented supply chain                                                                     | 2.14%             | 7.86%  | 26.43% | 33.57%                  | 30.00%                  | 1       | 5       | 3.81 | 1.02          | 1.04     |
| <b>12</b> | Lack of knowledge of what other industries/companies offer as waste that could be resources | 2.13%             | 4.96%  | 15.60% | 43.97%                  | 33.33%                  | 1       | 5       | 4.01 | 0.94          | 0.88     |
| <b>13</b> | Lack of market ready technologies/solutions                                                 | 0.71%             | 11.35% | 24.82% | 37.59%                  | 25.53%                  | 1       | 5       | 3.76 | 0.98          | 0.96     |
| <b>14</b> | Uncertainty about effectiveness/benefits of solutions                                       | 1.42%             | 11.35% | 24.82% | 38.30%                  | 24.11%                  | 1       | 5       | 3.72 | 1             | 0.99     |
| <b>15</b> | Encouraging sustainable lifestyles through design                                           | 17.02%            | 21.28% | 27.66% | 18.44%                  | 15.60%                  | 1       | 5       | 2.94 | 1.3           | 1.7      |
| <b>16</b> | lack of redeveloping/retrofitting existing buildings and infrastructure                     | 3.55%             | 14.18% | 25.53% | 37.59%                  | 19.15%                  | 1       | 5       | 3.55 | 1.06          | 1.13     |
| <b>17</b> | Negative perception of higher urban density                                                 | 7.09%             | 14.89% | 31.91% | 26.24%                  | 19.86%                  | 1       | 5       | 3.37 | 1.16          | 1.35     |
| <b>18</b> | Lack of opportunities/support from the government for public engagement                     | 2.13%             | 7.80%  | 15.60% | 31.91%                  | 42.55%                  | 1       | 5       | 4.05 | 1.04          | 1.08     |
| <b>19</b> | Lack of significant ties in the community to establish engagement (low social cohesion)     | 2.13%             | 7.09%  | 18.44% | 36.88%                  | 35.46%                  | 1       | 5       | 3.96 | 1.01          | 1.01     |
| <b>20</b> | Broader socioeconomic challenges that override environmental issues                         | 3.55%             | 2.84%  | 21.28% | 31.21%                  | 41.13%                  | 1       | 5       | 4.04 | 1.03          | 1.06     |

# **Inquiry on perceptions and practices of built environment professionals regarding regenerative and circular approaches**

Henrique Sala Benites, Paul Osmond and Deo Prasad

## **Supplementary file 3 | Survey results**

|           |                                                        |       |        |        |        |        |   |   |      |      |      |
|-----------|--------------------------------------------------------|-------|--------|--------|--------|--------|---|---|------|------|------|
| <b>21</b> | Informal urbanism/construction predominance            | 2.84% | 9.93%  | 27.66% | 29.08% | 30.50% | 1 | 5 | 3.74 | 1.08 | 1.17 |
|           | Lack of data on building and community performance and |       |        |        |        |        |   |   |      |      |      |
| <b>22</b> | operational costs                                      | 0.71% | 10.64% | 26.24% | 31.91% | 30.50% | 1 | 5 | 3.81 | 1.01 | 1.02 |

## **Q5.1 - In your projects/practices, to what extent do you...**

| #         | Question                                                         | Always | Most of the time | About half the time | Sometimes | Never  | Minimum | Maximum | Mean | Std Deviation | Variance |
|-----------|------------------------------------------------------------------|--------|------------------|---------------------|-----------|--------|---------|---------|------|---------------|----------|
| <b>1</b>  | implement design for assembly and disassembly?                   | 6.57%  | 8.76%            | 13.87%              | 37.96%    | 32.85% | 1       | 5       | 3.82 | 1.17          | 1.38     |
| <b>2</b>  | specify reused or recycled materials?                            | 8.03%  | 21.90%           | 17.52%              | 38.69%    | 13.87% | 1       | 5       | 3.28 | 1.18          | 1.4      |
|           | check the environmental information of the products and          |        |                  |                     |           |        |         |         |      |               |          |
| <b>3</b>  | components you specify/ buy/ use?                                | 20.59% | 30.15%           | 16.18%              | 21.32%    | 11.76% | 1       | 5       | 2.74 | 1.32          | 1.74     |
| <b>4</b>  | engage with post-occupancy performance assessment?               | 9.56%  | 22.06%           | 9.56%               | 29.41%    | 29.41% | 1       | 5       | 3.47 | 1.36          | 1.85     |
| <b>5</b>  | engage with your supply chain to develop sustainable solutions?  | 13.24% | 17.65%           | 11.03%              | 31.62%    | 26.47% | 1       | 5       | 3.4  | 1.38          | 1.92     |
|           | engage in projects with net zero aims (zero energy, or zero      |        |                  |                     |           |        |         |         |      |               |          |
| <b>6</b>  | water, or zero waste)                                            | 16.18% | 19.12%           | 15.44%              | 33.09%    | 16.18% | 1       | 5       | 3.14 | 1.34          | 1.8      |
|           | include circular or regenerative criteria in specifications or   |        |                  |                     |           |        |         |         |      |               |          |
| <b>7</b>  | procurement?                                                     | 11.03% | 10.29%           | 15.44%              | 34.56%    | 28.68% | 1       | 5       | 3.6  | 1.3           | 1.68     |
| <b>8</b>  | Use/implement Life Cycle Assessment                              | 8.09%  | 17.65%           | 13.97%              | 33.82%    | 26.47% | 1       | 5       | 3.53 | 1.27          | 1.62     |
|           | Use/implement building or community sustainability               |        |                  |                     |           |        |         |         |      |               |          |
| <b>9</b>  | certifications as LEED, BREEAM, AQUA, Green Star, etc.?          | 17.65% | 18.38%           | 13.97%              | 25.00%    | 25.00% | 1       | 5       | 3.21 | 1.45          | 2.09     |
|           | Use/implement product sustainability and circular certifications |        |                  |                     |           |        |         |         |      |               |          |
| <b>10</b> | as Cradle to Cradle, Declare, etc.?                              | 5.15%  | 13.24%           | 8.09%               | 20.59%    | 52.94% | 1       | 5       | 4.03 | 1.27          | 1.6      |
|           | use any database or platform to find reused, recycled, or        |        |                  |                     |           |        |         |         |      |               |          |
| <b>11</b> | salvaged materials?                                              | 5.88%  | 11.03%           | 11.03%              | 24.26%    | 47.79% | 1       | 5       | 3.97 | 1.25          | 1.56     |
|           | use any database or platform to identify sustainable or circular |        |                  |                     |           |        |         |         |      |               |          |
| <b>12</b> | materials and systems?                                           | 5.88%  | 9.56%            | 11.76%              | 24.26%    | 48.53% | 1       | 5       | 4    | 1.23          | 1.51     |

## **Q5.2 - If you use any database or platform to find green, sustainable, or regenerative materials and systems, please list them below if you wish.**

*Hidden to avoid any potential breach of privacy*

## **Q5.3 - To what extent (on a scale from 0 to 10) do you feel an online platform would be useful in helping you ...?**

| Question                                                    | 1     | 2     | 3     | 4     | 5     | 6     | 7      | 8      | 9      | 10     | Minimum | Maximum | Mean | Std Deviation | Variance |
|-------------------------------------------------------------|-------|-------|-------|-------|-------|-------|--------|--------|--------|--------|---------|---------|------|---------------|----------|
| identify regenerative and circular strategies and solutions | 0.73% | 0.73% | 2.92% | 1.46% | 3.65% | 3.65% | 16.79% | 16.06% | 13.14% | 40.88% | 1       | 10      | 8.3  | 1.98          | 3.9      |
| find second hand materials and systems                      | 0.74% | 1.48% | 0.74% | 1.48% | 5.19% | 2.96% | 13.33% | 16.30% | 12.59% | 45.19% | 1       | 10      | 8.44 | 1.94          | 3.77     |

## **Q6.1 - Are you aware of any code, laws, regulations, or standards that enforce or promote circular or regenerative practices in your locality?**

| #        | Answer | %      |
|----------|--------|--------|
| <b>1</b> | No     | 82.01% |
| <b>2</b> | Yes    | 17.99% |
|          | Total  | 100%   |

## **Q6.2 - If yes in the question above, please list them below if you wish:**

*Hidden to avoid any potential breach of privacy*

# **Inquiry on perceptions and practices of built environment professionals regarding regenerative and circular approaches**

Henrique Sala Benites, Paul Osmond and Deo Prasad

## **Supplementary file 3 | Survey results**

### **Q6.3 - To what extent (on a scale from 0 to 10) do you agree with the following statements?**

| # | Question                                                                               | 1     | 2     | 3     | 4     | 5     | 6     | 7     | 8      | 9      | 10     | Minimum | Maximum | Mean | Std<br>Deviation | Variance |
|---|----------------------------------------------------------------------------------------|-------|-------|-------|-------|-------|-------|-------|--------|--------|--------|---------|---------|------|------------------|----------|
|   | Policies should be developed or updated to foster circularity in the built environment | 0.00% | 0.00% | 0.72% | 0.00% | 5.80% | 4.35% | 5.80% | 14.49% | 9.42%  | 59.42% | 1       | 10      | 8.79 | 1.83             | 3.35     |
|   | There should be financial incentives to circular and regenerative solutions            | 0.72% | 2.17% | 0.00% | 0.72% | 2.17% | 4.35% | 5.80% | 17.39% | 12.32% | 54.35% | 3       | 10      | 8.93 | 1.6              | 2.55     |

### **Q7.1 - To what extent should community planning and design decisions be made "top-down" by government or private sector organisations, or driven "bottom-up" by local action?**

| #  | Answer | %        | # | Field | Minimum | Maximum | Mean | Std<br>Deviation | Variance |
|----|--------|----------|---|-------|---------|---------|------|------------------|----------|
| 5  |        | 5 47.06% | 1 | 1     | 0       | 10      | 5.44 | 2.12             | 4.51     |
| 8  |        | 8 8.82%  |   |       |         |         |      |                  |          |
| 4  |        | 4 8.09%  |   |       |         |         |      |                  |          |
| 3  |        | 3 7.35%  |   |       |         |         |      |                  |          |
| 7  |        | 7 7.35%  |   |       |         |         |      |                  |          |
| 10 |        | 10 7.35% |   |       |         |         |      |                  |          |
| 6  |        | 6 5.15%  |   |       |         |         |      |                  |          |
| 2  |        | 2 3.68%  |   |       |         |         |      |                  |          |
| 9  |        | 9 2.21%  |   |       |         |         |      |                  |          |
| 0  |        | 0 2.21%  |   |       |         |         |      |                  |          |
| 1  |        | 1 0.74%  |   |       |         |         |      |                  |          |
|    | Total  | 100%     |   |       |         |         |      |                  |          |

### **Q7.2 - To what extent (on a scale from 0 to 10) do you believe the design of urban spaces and buildings...**

| # | Question                                                              | 1     | 2     | 3     | 4     | 5     | 6     | 7      | 8      | 9      | 10     | Minimum | Maximum | Mean | Std<br>Deviation | Variance |
|---|-----------------------------------------------------------------------|-------|-------|-------|-------|-------|-------|--------|--------|--------|--------|---------|---------|------|------------------|----------|
|   | may have an impact on social inequities and environmental injustice?  | 0.72% | 0.72% | 2.90% | 1.45% | 7.25% | 5.07% | 10.87% | 25.36% | 16.67% | 28.99% | 1       | 10      | 8.02 | 1.97             | 3.86     |
|   | may be a reflection of social inequities and environmental injustice? | 1.45% | 1.45% | 2.90% | 0.72% | 5.80% | 5.80% | 12.32% | 17.39% | 17.39% | 34.78% | 1       | 10      | 8.09 | 2.12             | 4.51     |
|   | needs to have all society sectors/groups involved and represented?    | 0.72% | 0.72% | 2.17% | 0.72% | 7.25% | 6.52% | 7.25%  | 15.22% | 15.94% | 43.48% | 1       | 10      | 8.38 | 2                | 4.02     |

### **Q7.3 - To what extent (on a scale from 0 to 10) do you believe the use of playful or game-like methodologies could facilitate processes of participatory planning or co-design with...**

| # | Question                               | 0     | 1     | 2     | 3     | 4     | 5      | 6     | 7      | 8      | 9      | 10     |
|---|----------------------------------------|-------|-------|-------|-------|-------|--------|-------|--------|--------|--------|--------|
|   | communities' residents?                | 0.72% | 2.17% | 1.45% | 1.45% | 4.35% | 8.70%  | 7.25% | 12.32% | 20.29% | 15.94% | 25.36% |
|   | built environment professionals?       | 0.72% | 2.90% | 2.17% | 5.07% | 8.70% | 15.22% | 7.25% | 13.77% | 18.12% | 8.70%  | 17.39% |
|   | urban planning/ architecture students? | 0.00% | 0.73% | 2.19% | 0.73% | 2.19% | 13.14% | 2.92% | 12.41% | 23.36% | 13.14% | 29.20% |

Inquiry on perceptions and practices of built environment professionals regarding regenerative and circular approaches

Henrique Sala Benites, Paul Osmond and Deo Prasad

Supplementary file 3 | Survey results

Q7.4 - In a few words, what is your vision about the need to move away from the current industry green/sustainable practices and tools to a circular and regenerative approach?

Hidden to avoid any potential breach of privacy

Q8.2 - What is your age?

| # | Field             | Minimum | Maximum | Mean | Std<br>Deviation | Variance |
|---|-------------------|---------|---------|------|------------------|----------|
| 1 | What is your age? | 1       | 5       | 2.85 | 0.96             | 0.93     |
| # | Answer            | %       |         |      |                  |          |
| 1 | 18 to 25          | 5.07%   |         |      |                  |          |
| 2 | 26 to 35          | 31.16%  |         |      |                  |          |
| 3 | 36 to 45          | 46.38%  |         |      |                  |          |
| 4 | 46 to 55          | 8.70%   |         |      |                  |          |
| 5 | 56 to 65          | 8.70%   |         |      |                  |          |
| 6 | 66 or over        | 0.00%   |         |      |                  |          |
|   | Total             | 100%    |         |      |                  |          |

Q8.3 - What is your gender?

|   |                                        |        |
|---|----------------------------------------|--------|
| # | Field                                  |        |
| 1 | What is your gender? - Selected Choice |        |
| # | Answer                                 | %      |
| 1 | Female                                 | 50.00% |
| 2 | Male                                   | 48.55% |
| 3 | Prefer not to say                      | 1.45%  |
| 4 | Other (please specify)                 | 0.00%  |
|   | Total                                  | 100%   |

Q8.3\_4 - Other (please specify)

Q8.4 - In what sector do you work? In case it is more than one, please select the most relevant.

|    |                                                                                           |        |
|----|-------------------------------------------------------------------------------------------|--------|
| #  | Field                                                                                     |        |
| 1  | In what sector do you work? In case it is more than one, please select the most relevant. |        |
| #  | Answer                                                                                    | %      |
| 1  | Regulator (policy makers, government at any level, standard dev                           | 4.35%  |
| 2  | Public or private developer, landowner, investor                                          | 4.35%  |
| 3  | Supplier (supplier, manufacturer, supply chain management)                                | 0.00%  |
| 4  | Project management                                                                        | 3.62%  |
| 5  | Demolition/Deconstruction                                                                 | 0.00%  |
| 6  | Builder (construction companies and related contractors)                                  | 2.17%  |
| 7  | Product/Industrial designer                                                               | 0.72%  |
| 8  | Designer (architect, urban designer, landscape architect)                                 | 29.71% |
| 9  | Sustainability/Climate/Environmental Consultant                                           | 23.19% |
| 10 | Other practitioners or consultants (engineers, archaeologists, soc                        | 9.42%  |
| 11 | Building/Facilities/Community management                                                  | 0.00%  |
| 12 | Civil Society/NGOs                                                                        | 2.90%  |
| 13 | Academia (educators, students, and researchers)                                           | 19.57% |
|    | Total                                                                                     | 100%   |

**Inquiry on perceptions and practices of built environment professionals regarding regenerative and circular approaches**

Henrique Sala Benites, Paul Osmond and Deo Prasad

**Supplementary file 3 | Survey results**

**Q8.5 - If you would like to be more specific, could you please state your professional role or function?**

*Hidden to avoid any potential breach of privacy*

**Q8.6 - Is your role directly related to environmental or sustainability issues?**

|   |                                                                            |        |
|---|----------------------------------------------------------------------------|--------|
| # | Field                                                                      |        |
|   | 1 Is your role directly related to environmental or sustainability issues? |        |
| # | Answer                                                                     | %      |
|   | 1 Yes                                                                      | 77.54% |
|   | 2 No                                                                       | 22.46% |
|   | Total                                                                      | 100%   |

**Q8.7 - What is the size of the organisation you work for most of your time?**

|   |                                                                        |        |
|---|------------------------------------------------------------------------|--------|
| # | Field                                                                  |        |
|   | 1 What is the size of the organisation you work for most of your time? |        |
| # | Answer                                                                 | %      |
|   | 1 I am an independent professional                                     | 24.82% |
|   | 2 2-10 people                                                          | 19.71% |
|   | 3 11-50 people                                                         | 15.33% |
|   | 4 51-100 people                                                        | 6.57%  |
|   | 5 101-500 people                                                       | 7.30%  |
|   | 6 More than 500 people                                                 | 26.28% |
|   | Total                                                                  | 100%   |

**Q8.8 - Does your company operate in more than one country?**

|   |                                                       |        |
|---|-------------------------------------------------------|--------|
| # | Field                                                 |        |
|   | 1 Does your company operate in more than one country? |        |
| # | Answer                                                | %      |
|   | 1 Yes                                                 | 27.94% |
|   | 2 No                                                  | 72.06% |
|   | Total                                                 | 100%   |

**Q8.9 - What scales/domains of the built environment is your company engaged with? Check all that apply.**

|   |                           |        |
|---|---------------------------|--------|
| # | Answer                    | %      |
|   | 1 Product/Components      | 11.36% |
|   | 2 Buildings               | 39.77% |
|   | 3 Community/Neighbourhood | 24.62% |
|   | 4 City/Region             | 24.24% |
|   | Total                     | 100%   |

**Inquiry on perceptions and practices of built environment professionals regarding regenerative and circular approaches**

Henrique Sala Benites, Paul Osmond and Deo Prasad

**Supplementary file 3 | Survey results**

**Q8.10 - For how many years have you been involved in the built environment industry?**

| # | Answer            | %      |
|---|-------------------|--------|
| 1 | Less than 2 years | 6.57%  |
| 2 | >2-5 years        | 10.22% |
| 3 | >5-10 years       | 16.06% |
| 4 | >10-15 years      | 30.66% |
| 5 | >15-20 years      | 11.68% |
| 6 | >20 years         | 24.82% |
|   | Total             | 100%   |

**Q8.11 - And finally, what city and country are you located at?**

*Hidden to avoid any potential breach of privacy*
