# Supplementary material
Source: MDPI journal article supplement (https://www.mdpi.com/2075-5309/13/1/63)
Supplement: s1 [file s1 › RC_Inquiry_Suppl4_Demographics_00.pdf]

# Inquiry on perceptions and practices of built environment professionals regarding regenerative and circular approaches

Henrique Sala Benites, Paul Osmond and Deo Prasad

## Supplementary file 4

Table S4.1 Demographic profiles

| Data                                      | Survey | Interview |
|-------------------------------------------|--------|-----------|
| Total participants                        | 146    | 18        |
| <b>Gender</b>                             |        |           |
| Female                                    | 69     | 10        |
| Male                                      | 67     | 8         |
| Prefer not to say/ Did not respond        | 10     | -         |
| <b>Age**</b>                              |        |           |
| 18-25                                     | 7      | -         |
| 26 to 35                                  | 43     | -         |
| 36 to 45                                  | 64     | -         |
| 46 to 55                                  | 12     | -         |
| Over 56                                   | 12     | -         |
| <b>Language of survey/interview</b>       |        |           |
| English                                   | 64     | 7         |
| Portuguese                                | 72     | 9         |
| Spanish                                   | 10     | 2         |
| <b>Built environment subsector***</b>     |        |           |
| Regulator (REG)                           | 6      | 4         |
| Developer (DEV)                           | 6      | 0         |
| Supplier (SUP)                            | 0      | 5         |
| Project manager (PM)                      | 5      | 1         |
| Builder/Demolisher (C&D)                  | 3      | 0         |
| Designer (DES)                            | 42     | 2         |
| Sustainability consultant (SUS)           | 32     | 6         |
| Other practitioners (PRCT)                | 13     | 0         |
| Civil Society/NGO (NGO)                   | 4      | 1         |
| Academia (ACA)                            | 27     | 2         |
| Operator/Facilities management (FM)       | 0      | 0         |
| <b>Role related to sustainability**</b>   |        |           |
| Yes                                       | 107    | 18        |
| No                                        | 31     | 0         |
| <b>Years in built environment**</b>       |        |           |
| Less than 2 years                         | 9      | -         |
| >2-5 years                                | 14     | -         |
| >5-6 years                                | 22     | -         |
| >10-15 years                              | 42     | -         |
| >15-20 years                              | 16     | -         |
| >20 years                                 | 34     | -         |
| <b>Size of organisation**</b>             |        |           |
| Independent professional                  | 34     | -         |
| 2-10 people                               | 27     | -         |
| 11-50 people                              | 21     | -         |
| 51-100 people                             | 9      | -         |
| 101-500 people                            | 10     | -         |
| Over 500 people                           | 36     | -         |
| <b>Company operates internationally**</b> |        |           |
| Yes                                       | 38     | -         |
| No                                        | 98     | -         |
| <b>Scale/domain of engagement**</b>       |        |           |
| Product/components                        | 30     | -         |
| Buildings                                 | 105    | -         |

|                         |    |   |
|-------------------------|----|---|
| Community/Neighbourhood | 65 | - |
| City/Region             | 64 | - |

Notes:

\* The sum of some responses may not equal the total participants due to blank responses

\*\* Interviewees were not specifically asked these demographic questions.

\*\*\* Some interviewees were classified in more than one subsector.

Table S4.2 Detailed profiles of interviewees

|                                                                                                                                                                                                                                                                                     |                                                                                                                                                                                                                                                                               |                                                                                                                                                                                                                                |
|-------------------------------------------------------------------------------------------------------------------------------------------------------------------------------------------------------------------------------------------------------------------------------------|-------------------------------------------------------------------------------------------------------------------------------------------------------------------------------------------------------------------------------------------------------------------------------|--------------------------------------------------------------------------------------------------------------------------------------------------------------------------------------------------------------------------------|
| <b>001.NGO.BR</b><br>Architect and urban planner, volunteer at a local hub of an initiative for regenerative urban transitions, and Latin America hub articulator. Also works with social sustainability at a B-Company.                                                            | <b>002.REG.BR</b><br>Architect working as a project auditor for a company responsible for the LEED and GBC Brasil certification schemes. Former career as a sustainability consultant.                                                                                        | <b>003.DES.PT</b><br>Co-founder and lead designer in an international regenerative design collective and responsible for a regenerative framework for refugee settlements.                                                     |
| <b>004.SUS.BR</b><br>Architect and urbanist dedicated to sustainability as a designer and coordinating its implementation in the design and construction of a large urban precinct. Currently corporate sustainability consultant focused on SDGs and corporate/ citizen trainings. | <b>005.ACA.BR</b><br>Architect and urbanist (PhD), university professor and researcher linked to programmes related to sustainable urban planning, landscape, and social housing, including projects in areas with populations that are socially and environmentally fragile. | <b>006.REG.BR</b><br>Civil engineer and auditor at a local auditing company responsible for a building and community certification system, building energy label. Also engaged with environmental product declarations.        |
| <b>007.SUP.NL</b><br>Partnership manager at a building's Materials Passport company. Background in Business Administration and innovation and entrepreneurship.                                                                                                                     | <b>008.SUS.BR</b><br>Architect, urbanist, and educator working as a sustainability consultant for the built environment. Role focused on urban scale and smart city projects.                                                                                                 | <b>009.SUP_DES.BR</b><br>Architect, urbanist, and landscape architect (PhD). Produces building solutions made from construction and demolition waste and implements green infrastructure interventions in the city.            |
| <b>010.SUP.AU</b><br>Circular economy consultant engaged with community and built environment projects. Representative of a building's Materials Passport company.                                                                                                                  | <b>011.SUS.AU</b><br>Urban and environmental planner with UK and Australia experience, working as a consultant for precinct development with a focus on regenerative approaches.                                                                                              | <b>012.SUS.NL</b><br>Global director in an engineering and consultancy company. Responsible for in-company research about the circular economy in the built environment. Also engaged in other socioenvironmental initiatives. |
| <b>013.SUS.BO</b><br>Environmental engineer with experience in the public sector, and consultant in sustainability and circular economy. Also, researcher, mentor for social entrepreneurs, and technical expert of the ISO Circular Economy Committee.                             | <b>014.SUP.BR.AU</b><br>Executive director in a company that offers a Life Cycle Assessment software for the built environment sector. Background in engineering.                                                                                                             | <b>015.SUS.NL</b><br>Consultant, with a background in political science and sustainability, working in the Built Environment Programme of a not-for-profit impact organization focused on circular economy.                    |
| <b>016.SUP.BR</b><br>Green roof supplier with a background in agronomic engineering, permaculture, and a master's degree in ethnobotany.                                                                                                                                            | <b>017.PM.FI</b><br>Project manager at a public innovation company working with citizen participation and smart-district developments. Background in social psychology, urban studies, and environmental policy.                                                              | <b>018.REG.CL</b><br>Architect coordinating sustainability and circular economy strategies and initiatives for the built environment sector in a mixed public-private organisation.                                            |

Notes:

The name of the respondents is replaced with a code (AAA.BBB.CC), where AAA is the number of the interview, BBB is the subsector (see Table S4.3), and CC refers to the two-letter code of the country they are based at (as per ISO 3166: <https://www.iban.com/country-codes>). Some are classified in more than one sector or based in more than one country.

**Table S4.3 Built environment subsector codes**

| <b>Code</b> | <b>Subsector</b>          |
|-------------|---------------------------|
| REG         | Regulator                 |
| DEV         | Developer                 |
| SUP         | Supplier                  |
| PM          | Project manager           |
| C&D         | Builder/Demolisher        |
| DES         | Designer                  |
| SUS         | Sustainability Consultant |
| PRA         | Other practitioners       |
| NGO         | Civil Society/NGOs        |
| ACA         | Academic                  |
| FM          | Facilities management     |
